# Supplementary material for: Evolution of the Sex Pheromone Communication System in Ostrinia Moths
Source: MDPI journal article supplement (doi:10.3390/insects12121067), 2021-11-28
Supplement: s1 [file s1]

**Table S1.** Genbank accession numbers of the amino acid sequences used in the construction of phylogenetic tree in Figure 4.

| <b>Gene name</b>  | <b>Accession no.</b> | <b>Gene name</b>  | <b>Accession no.</b> | <b>Gene name</b>  | <b>Accession no.</b> |
|-------------------|----------------------|-------------------|----------------------|-------------------|----------------------|
| <b><u>ACB</u></b> |                      | <b><u>ECB</u></b> |                      | <b><u>ABB</u></b> |                      |
| OfurOR1           | AGG91642             | OnubOR1           | ADB89182             | OscOR1            | BAH57975             |
| OfurOR3           | AGG91644             | OnubOR3           | ADB89181             | OscOR3            | BAI66604             |
| OfurOR4           | AGG91645             | OnubOR4           | ADB89180             | OscOR4            | BAI66605             |
| OfurOR5a          | AGG91646             | OnubOR5           | ADB89178             | OscOR5            | BAI66607             |
| OfurOR5b          | AGG91647             | OnubOR6           | ADB89183             | OscOR6            | BAJ22889             |
| OfurOR6           | AGG91648             | OnubOR7           | BAI66627             | OscOR7            | BAI66609             |
| OfurOR7           | AGG91649             | OnubOR8           | BAJ61934             | OscOR8            | BAI66610             |
| OfurOR8           | AGG91650             | OnubOrco          | ADB89179             | OscOrco           | BAH57973             |
| OfurOrco          | AGG91643             |                   |                      |                   |                      |
